# Supplementary material for: Efficacy and safety of dual SGLT 1/2 inhibitor sotagliflozin in type 1 diabetes: meta-analysis of randomised controlled trials
Source: PubMed Central journal article supplement — BMJ. 2019 Apr 9;365:l1328. doi: 10.1136/bmj.l1328 (PMC6454301; doi:10.1136/bmj.l1328), 2019-04-09
Supplement: musg047845.wt.pdf [file musg047845.wt.pdf]

## **Supplementary Tables**

**SupplementaryTable 1. Characteristics (panel A) and Risk of Bias (panel B) of included trials.**

| <b>Supplementary Table 1 panel A. Characteristics of included randomized controlled trials</b> |                            |                                      |                   |                     |                        |                                                     |                                  |                                       |                                                             |                            |                                                       |  |
|------------------------------------------------------------------------------------------------|----------------------------|--------------------------------------|-------------------|---------------------|------------------------|-----------------------------------------------------|----------------------------------|---------------------------------------|-------------------------------------------------------------|----------------------------|-------------------------------------------------------|--|
| <b>Author</b>                                                                                  | <b>N-<br/>participants</b> | <b>Study<br/>duration<br/>(week)</b> | <b>Study Arms</b> | <b>Age<br/>(yr)</b> | <b>Gender<br/>(%M)</b> | <b>Bodyweight (kg) /<br/>BMI (kg/m<sup>2</sup>)</b> | <b>Initial<br/>HbA1c<br/>(%)</b> | <b>Diabetes<br/>duration<br/>(yr)</b> | <b>Background<br/>treatment /<br/>Daily T1D<br/>(IU/kg)</b> | <b>Dropout<br/>rate(%)</b> | <b>Renal<br/>function</b>                             |  |
| <b>Sands<br/>2015</b>                                                                          | 33                         | 4                                    | Sota 400 mg       | 45                  | 50                     | 74.2 kg /<br>27.1 kg/m <sup>2</sup>                 | 7.94                             | 18.5                                  | Insulin 0.6<br>IU/kg                                        | 0%                         | eGFR <sub>≥</sub> 60<br>ml/min/1.73<br>m <sup>2</sup> |  |
|                                                                                                |                            |                                      | placebo           | 44                  | 47                     | 72.7 kg / 26.2                                      | 7.98                             | 16.8                                  | Insulin 0.6<br>IU/kg                                        | 0%                         |                                                       |  |
| <b>Bode<br/>2017</b>                                                                           | 87                         | 12                                   | Sota 400 mg       | 23                  | 49                     | 83.8 kg / 29.0                                      | 9.9                              | 12                                    | Insulin 0.8<br>IU/kg                                        | 0%                         | eGFR <sub>≥</sub> 45<br>ml/min/1.73<br>m <sup>2</sup> |  |
|                                                                                                |                            |                                      | placebo           | 22                  | 45                     | 80.7 kg / 27.9                                      | 9.7                              | 12                                    | Insulin 0.8<br>IU/kg                                        | 4.8%                       |                                                       |  |
| <b>Baker<br/>2017</b>                                                                          | 141                        | 12                                   | Sota 400 mg       | 45                  | 57                     | 84.1 kg / 29                                        | 8.1                              | 24                                    | Insulin<br>0.7 IU/kg                                        | 0%                         | eGFR <sub>≥</sub> 60<br>ml/min/1.73<br>m <sup>2</sup> |  |
|                                                                                                |                            |                                      | Sota 200 mg       | 47                  | 47                     | 81.9 kg / 28                                        | 8.1                              | 24                                    | Insulin<br>0.7 IU/kg                                        | 0%                         |                                                       |  |
|                                                                                                |                            |                                      | Sota 75 mg        | 42                  | 40                     | 78.1 kg / 27                                        | 8.0                              | 23                                    | Insulin<br>0.7 IU/kg                                        | 2.7%                       |                                                       |  |
|                                                                                                |                            |                                      | placebo           | 48                  | 42                     | 89.6 kg /31                                         | 8.0                              | 27                                    | Insulin<br>0.7 IU/kg                                        | 2.7%                       |                                                       |  |

| Author                | N-<br>participants | Study<br>duration<br>(week) | Study Arms  | Age<br>(yr) | Gender<br>(%M) | Bodyweight (kg) /<br>BMI (kg/m <sup>2</sup> ) | Initial<br>HbA1c (%) | Diabetes<br>duration<br>(yr) | Background<br>treatment /<br>Daily T1D<br>(IU/kg) | Dropout<br>rate | Renal<br>function                            |
|-----------------------|--------------------|-----------------------------|-------------|-------------|----------------|-----------------------------------------------|----------------------|------------------------------|---------------------------------------------------|-----------------|----------------------------------------------|
| <b>Garg<br/>2017</b>  | 1402               | 24                          | Sota 400 mg | 43          | 51             | 82.4 kg/ 28.3                                 | 8.2                  | 20                           | Insulin<br>0.7 IU/kg                              | 13%             | eGFR $\geq$ 45<br>ml/min/1.73 m <sup>2</sup> |
|                       |                    |                             | placebo     | 42          | 48             | 81.6/28.1                                     | 8.2                  | 20                           | Insulin<br>0.7 IU/kg                              | 11%             | 73 m <sup>2</sup>                            |
| <b>Buse<br/>2018</b>  | 793                | 52                          | Sota 400 mg | 46          | 46             | 86.5 kg/29.6                                  | 7.6                  | 24                           | Insulin<br>0.7 IU/kg                              | 10%             | eGFR $\geq$ 45<br>ml/min/1.73 m <sup>2</sup> |
|                       |                    |                             | Sota 200 mg | 47          | 48             | 86.9 kg/29.8                                  | 7.6                  | 25                           | Insulin<br>0.7 IU/kg                              | 9%              | 73 m <sup>2</sup>                            |
|                       |                    |                             | placebo     | 45          | 51             | 87.3 kg/29.6                                  | 7.5                  | 24                           | Insulin<br>0.7 IU/kg                              | 12%             |                                              |
| <b>Danne<br/>2018</b> | 782                | 52                          | Sota 400 mg | 41          | 51             | 81.9 kg/ 27.9                                 | 7.7                  | 19                           | Insulin<br>0.7 IU/kg                              | 8%              | eGFR $\geq$ 45<br>ml/min/1.73 m <sup>2</sup> |
|                       |                    |                             | Sota 200 mg | 42          | 53             | 81.9 kg/ 27.9                                 | 7.7                  | 18                           | Insulin<br>0.7 IU/kg                              | 8%              | 73 m <sup>2</sup>                            |
|                       |                    |                             | placebo     | 40          | 52             | 81.1 kg/ 27.5                                 | 7.7                  | 18                           | Insulin<br>0.7 IU/kg                              | 8%              |                                              |

**Supplementary Table 1 panel BRisk of Bias of included randomized controlled trials**

| <b>Author</b>     | <b>Random sequence generation</b>    | <b>Allocation concealment</b>                            | <b>Blinding of participants and personnel</b>                                                | <b>Blinding of outcome assessment</b>                                                         | <b>Incomplete outcome data</b>       | <b>Selective reporting</b>                                                                                | <b>Other: sponsorship bias</b>                                               |
|-------------------|--------------------------------------|----------------------------------------------------------|----------------------------------------------------------------------------------------------|-----------------------------------------------------------------------------------------------|--------------------------------------|-----------------------------------------------------------------------------------------------------------|------------------------------------------------------------------------------|
| <b>Sands 2015</b> | Low risk.<br>Computer generated list | Low risk.<br>Central allocation, web-based randomization | Low risk.<br>Quadruple masking (Participant, Care Provider, Investigator, Outcomes Assessor) | Low risk.<br>Quadruple masking (Participant, Care Provider, Investigator, Outcomes Assessors) | Low risk.<br>No patients dropped out | Low risk.<br>Prespecified outcomes available on a clinical trial database and all reported in publication | Low risk.<br>The Robert and Janice McNair Foundation partly funded the study |
| <b>Bode 2017</b>  | Low risk.<br>Computer generated list | Low risk.<br>Central allocation, web-based randomization | Low risk.<br>Quadruple masking                                                               | Low risk.<br>Quadruple masking                                                                | Low risk.<br>Low dropout rate:       | Low risk.<br>Prespecified outcomes available on a clinical trial database and all reported in publication | Low risk.<br>JDRF partly funded the study                                    |
| <b>Baker 2017</b> | Low risk.<br>Computer generated list | Low risk.<br>Central allocation, web-based randomization | Low risk.<br>Quadruple masking                                                               | Low risk.<br>Quadruple masking                                                                | Low risk.<br>Low dropout rate:       | Low risk.<br>Prespecified outcomes available on a clinical trial database and all reported in publication | Low risk.<br>Industry funded but no high risk of bias feature encountered*   |

**Panel B(continued). Risk of Bias of included randomized controlled trials**

| <b>Author</b>     | <b>Random sequence generation</b>    | <b>Allocation concealment</b>                           | <b>Blinding of participants and personnel</b>                                               | <b>Blinding of outcome assessment</b> | <b>Incomplete outcome data</b>                                                       | <b>Selective reporting</b>                                                                               | <b>Other: sponsorship bias</b>                                            |
|-------------------|--------------------------------------|---------------------------------------------------------|---------------------------------------------------------------------------------------------|---------------------------------------|--------------------------------------------------------------------------------------|----------------------------------------------------------------------------------------------------------|---------------------------------------------------------------------------|
| <b>Garg 2017</b>  | Low risk.<br>Computer generated list | Low risk<br>Central allocation, web-based randomization | Low risk<br>Quadruple masking (Participant, Care Provider, Investigator, Outcomes Assessor) | Low risk<br>Quadruple masking         | Low risk<br>Low dropout rate:<br>Missing observations at EOT imputed as nonresponse. | Low risk<br>Prespecified outcomes available on a clinical trial database and all reported in publication | Low risk<br>Industry funded but no high risk of bias feature encountered* |
| <b>Buse 2018</b>  | Low risk.<br>Computer generated list | Low risk<br>Central allocation, web-based randomization | Low risk<br>Quadruple Masking                                                               | Low risk<br>Quadruple masking         | Low risk<br>Low dropout rate:<br>Missing observations at EOT imputed as nonresponse. | Low risk<br>Prespecified outcomes available on a clinical trial database and all reported in publication | Low risk<br>Industry funded but no high risk of bias feature encountered* |
| <b>Danne 2018</b> | Low risk.<br>Computer generated list | Low risk<br>Central allocation, web-based randomization | Low risk<br>Quadruple Masking                                                               | Low risk<br>Quadruple masking         | Low risk<br>Low dropout rate:<br>Missing observations at EOT imputed as nonresponse. | Low risk<br>Prespecified outcomes available on a clinical trial database and all reported in publication | Low risk<br>Industry funded but no high risk of bias feature encountered* |

**Abbreviations:** eGFR: estimated glomerular filtration rate;JDRF: Juvenile Diabetes Research Foundation;

Sota: sotagliflozin; TID: total insulin dose

<sup>a</sup>Insulin dose optimization during the 6 weeks preceding randomization(target: FPG 80-130 mg/dL and 2hr-PPG<180 mg/dL)

**\*Assessment of sponsorship bias:** in the presence of industry sponsorship, the following list of 8 items in trial designing, conducting or reporting, empirically linked by existing literature to biased outcomes in industry-funded trials and not captured by the Cochrane Risk of Bias domains, were assessed: if any one item was present, the trial was downgraded to “high risk of bias”.

**Item a:**unclearclinical relevance of outcome measures: the clinical relevance of trial outcomes is not supported by international guidelines (American Association for the study of Diabetes-ADA or European Association for the Study of Diabetes-EASD guidelines).

**Item b:** if active comparator was used: inadequacy of doses timing or way of administration,

**Item c:** -deviationsfrom study protocol or original protocol changes or amendments after trial initiation

**Item d:** post-hoc selection of the major findings and endpoints

**Item e:** use of last observation carried forward analysis to impute missing data

**Item f:**on-treatment outcome reporting /absence of data and safety monitoring board

**Item g:**absence of sponsor-independent statistician and data analysis

**Item h:** early trial termination before the endpoint recorded on clinical trial registries

**Supplementary Table 2.** Characteristics of randomized controlled trials(RTCs) with sotagliflozin excluded from this meta-analysis.

| <b>Phase 1 trials</b>                                                                                                                                                         |                                |                                                            |                            |                                                 |
|-------------------------------------------------------------------------------------------------------------------------------------------------------------------------------|--------------------------------|------------------------------------------------------------|----------------------------|-------------------------------------------------|
| <b>Official Title<br/>(author/ year of publication)<br/>ClinicalTrials.gov ID number</b>                                                                                      | <b>Drug<br/>(dose)</b>         | <b>N-<br/>participants<br/>(actual or<br/>anticipated)</b> | <b>Duration<br/>(week)</b> | <b>Year of<br/>registration<br/><br/>Status</b> |
| Effect of Rifampicin on the Pharmacokinetics and Pharmacodynamics of Sotagliflozin<br>NCT03063580                                                                             | Sota<br>400 mg                 | 16                                                         | 7.5                        | 2017<br>Completed                               |
| Oral Contraceptive DDI Study<br>NCT02494609                                                                                                                                   | Sota<br>400 mg                 | 30                                                         | 4                          | 2015<br>Active, not<br>recruiting               |
| PK Study of Sotagliflozin in Subjects With Hepatic Impairment<br>NCT02471274                                                                                                  | Sota<br>400 mg                 | 32                                                         | 1                          | 2015<br>Completed                               |
| Interaction study to evaluate the Effects of Mefenamic Acid on the Pharmacokinetics and Pharmacodynamics of Sotagliflozin in Healthy Male and Female Subjects.<br>NCT03070678 | Sota<br>400 mg                 | 16                                                         | 8                          | 2017<br>Completed                               |
| A Drug to Drug Interaction Study of Sotagliflozin With Midazolam and Metoprolol.<br>NCT02940379                                                                               | Sota<br>200 mg<br>or 400<br>mg | 24                                                         | 8                          | 2016<br>Completed                               |
| Sotagliflozin Bioequivalence Study<br>NCT03211195                                                                                                                             | Sota<br>200 mg                 | 76                                                         | 9                          | 2017<br>Completed                               |
| A Study to Evaluate the Effect of Food on the Pharmacokinetics of Sotagliflozin and to Explore the Relative Bioavailability in Healthy Subjects.<br>NCT03174548               | Sota<br>200 mg                 | 14                                                         | 9                          | 31/05/2017<br>Completed                         |
| A Drug to Drug Interaction Study of Sotagliflozin With Hydrochlorothiazide<br>NCT03387657                                                                                     | Sota<br>200 mg                 | 16                                                         | 2                          | 2018<br>Completed                               |
| Comparison of Sotagliflozin Prototype Tablets With                                                                                                                            | Sota                           | 12                                                         | 9                          | 2017                                            |

|                                                                                                                                                                      |                                     |                                                            |                            |                                                 |
|----------------------------------------------------------------------------------------------------------------------------------------------------------------------|-------------------------------------|------------------------------------------------------------|----------------------------|-------------------------------------------------|
| Reference Tablet in Healthy Subjects<br>NCT03310944                                                                                                                  | 400 mg                              |                                                            |                            | Completed                                       |
| A Bioequivalence Study Testing Two Formulations of Sotagliflozin in Healthy Male and Female Subjects Under Fasted Conditions<br>NCT03776227                          | Sota<br>200 mg<br>or 400<br>mg      | 58                                                         | 14                         | 2018<br>Active,<br>not yet<br>recruiting,       |
| A Phase 1, Open-label, Parallel-group Study to Evaluate Sotagliflozin Safety and Pharmacokinetics in Subjects With Varying Degrees of Renal Function,<br>NCT02647918 | Sota<br>200 mg                      | 44                                                         | 1                          | 2015<br>Active, Not<br>recruiting               |
| A Drug-Drug Interaction Study Between Sotagliflozin and Ramipril<br>NCT03414723                                                                                      | Sota<br>400 mg                      | 1                                                          | 9                          | 2018<br>Completed                               |
| <b>Randomized trials in type 2 diabetes mellitus(T2DM)</b>                                                                                                           |                                     |                                                            |                            |                                                 |
| <b>Official Title<br/>(author/ year of publication)<br/>ClinicalTrials.gov ID</b>                                                                                    | <b>Sota dose</b>                    | <b>N-<br/>participants<br/>(actual or<br/>anticipated)</b> | <b>Duration<br/>(week)</b> | <b>Year of<br/>registration<br/><br/>Status</b> |
| A Randomized, Open-Label, Three-Way Crossover Study of Two Oral Formulations of LX4211 in Subjects With Type 2 Diabetes Mellitus<br>NCT01188863                      | Sota<br>150 mg<br>or 300<br>mg      | 15                                                         | 4                          | 2012<br>Completed                               |
| A Study to Evaluate the Pharmacodynamic Effects of Single-Dose Co-Administration of LX4211 With Januvia® in Type 2 Diabetics<br>NCT01441232                          | Sota<br>400 mg                      | 18                                                         | 3                          | 2015<br>Completed                               |
| Pharmacodynamic and Pharmacokinetic Effects of LX4211 in Subjects With Type 2 Diabetes and Renal Impairment<br>NCT01555008                                           | Sota<br>400 mg                      | 31                                                         | 1                          | 2015<br>Completed                               |
| Safety and Efficacy of LX4211 With Metformin in Type 2 Diabetes Patients With Inadequate Glycemic Control on Metformin<br>NCT01376557                                | Sota 75<br>mg, 200<br>mg, 400<br>mg | 299                                                        | 12                         | 2015<br>completed                               |
| Efficacy and Safety of Sotagliflozin Versus Placebo in Chinese Patients With Type 2 Diabetes Mellitus Not Adequately Controlled by Diet and Exercise<br>NCT03760965  | Sota<br>200 mg<br>or 400<br>mg      | 369                                                        | 24                         | 29/11/2018<br>Recruiting,                       |



|                                                                                                                                                                                                                                            |                                      |      |         |                                         |
|--------------------------------------------------------------------------------------------------------------------------------------------------------------------------------------------------------------------------------------------|--------------------------------------|------|---------|-----------------------------------------|
| Efficacy and Safety of Sotagliflozin Versus Placebo in Chinese Patients With Type 2 Diabetes Mellitus Not Adequately Controlled by Metformin With or Without Sulfonylurea<br>NCT03761134                                                   | Sota<br>200 mg<br>or 400<br>mg       | 369  | 24      | Recruiting<br>29/11/2018                |
| Effect of Sotagliflozin on Cardiovascular Events in Patients With Type 2 Diabetes Post Worsening Heart Failure (SOLOIST-WHF Trial)<br>NCT03521934                                                                                          | Sota<br>200 mg<br>or 400<br>mg       | 4000 | 32      | Recruiting30<br>/04/2018                |
| Comparison of Pharmacodynamic Effects of Sotagliflozin and Empagliflozin in T2DM Patients With Mild to Moderate Hypertension<br>NCT03462069                                                                                                | Sota<br>400 mg                       | 40   | 8       | Recruiting<br>06/03/2018                |
| Efficacy and Bone Safety of Sotagliflozin Dose 1 and Dose 2 Versus Placebo in Subjects With Type 2 Diabetes Mellitus Who Have Inadequate Glycemic Control.(SOTA-BONE Trial)<br>NCT03386344                                                 | Sota<br>200 mg<br>or 400<br>mg       | 360  | 24      | Active, not<br>recruiting<br>21/12/2017 |
| Efficacy and Safety of Sotagliflozin Versus Glimepiride and Placebo in Subjects With Type 2 Diabetes Mellitus That Are Taking Metformin Monotherapy(SOTA-GLIM trial)<br>NCT03332771                                                        | Sota<br>200 mg<br>or 400<br>mg       | 930  | 52      | Active, Not<br>recruiting<br>02/11/2017 |
| Efficacy and Safety of Sotagliflozin versus Placebo and Empagliflozin in Subjects with Type 2 Diabetes Mellitus who have Inadequate Glycemic Control while taking a DPP4 Inhibitor Alone or with Metformin(SOTA-EMPA trial)<br>NCT03351478 | Sota<br>400 mg                       | 700  | 26      | Active, not<br>recruiting               |
| Effect of Sotagliflozin on Cardiovascular and Renal Events in Patients with Type 2 Diabetes and Moderate Renal Impairment Who Are at Cardiovascular Risk(SCORED trial)<br>NCT03315143                                                      | Sota<br>200 mg<br>vs. 400<br>mg      | 1500 | 5 years | Active,<br>recruiting<br>04/10/2017     |
| Efficacy and Safety of Sotagliflozin versus Placebo in Subjects with Type 2 Diabetes Mellitus who have inadequate glycemic control while Taking Insulin Alone or with Other Oral Antidiabetic Agents(SOTA-INS trial)<br>NCT03285594        | Sota<br>200 mg<br>vs. sota<br>400 mg | 560  | 96      | Active, not<br>recruiting<br>2017       |
| Safety and Efficacy Study of Sotagliflozin on Glucose Control in Patients With Type 2 Diabetes, Moderate Impairment of Kidney Function, and Inadequate Blood Sugar Control (SOTA-CKD3 trial)                                               | Sota<br>200 mg<br>vs. sota<br>400 mg | 780  | 52      | Active, Not<br>recruiting<br>03/08/2017 |

|                                                                                                                                                                                                                                         |                                      |                                                            |                            |                                                  |
|-----------------------------------------------------------------------------------------------------------------------------------------------------------------------------------------------------------------------------------------|--------------------------------------|------------------------------------------------------------|----------------------------|--------------------------------------------------|
| NCT03242252                                                                                                                                                                                                                             |                                      |                                                            |                            |                                                  |
| A Study to Evaluate Safety and Effects of Sotagliflozin Dose 1 and Dose 2 on Glucose Control in Patients With Type 2 Diabetes, Severe Impairment of Kidney Function and Inadequate Blood Sugar Control.(SOTA-CKD4 trial)<br>NCT03242018 | Sota<br>200 mg<br>vs. sota<br>400 mg | 276                                                        | 52                         | Active, Not<br>recruiting<br>03/08/2017          |
| Efficacy and Safety of Sotagliflozin Versus Placebo in Patients With Type 2 Diabetes Mellitus on Background of Sulfonylurea Alone or With Metformin<br>NCT03066830                                                                      | Sota<br>400 mg                       | 500                                                        | 26                         | Active,<br>Not<br>recruiting<br>24/02/2017       |
| Efficacy and Safety of Sotagliflozin Versus Placebo in Patients With Type 2 Diabetes Mellitus Not Currently Treated With Antidiabetic Therapy<br>NCT02926937                                                                            | Sota<br>400 mg                       | 400                                                        | 26                         | Active, Not<br>recruiting<br>05/10/2016          |
| Efficacy and Safety of Sotagliflozin Versus Placebo in Patients With Type 2 Diabetes Mellitus on Background of Metformin<br>NCT02926950                                                                                                 | Sota<br>200 mg<br>vs. sota<br>400 mg | 500                                                        | 26                         | Active, Not<br>recruiting<br>05/10/2016          |
| <b>Randomized trials in Congestive Heart Failure</b>                                                                                                                                                                                    |                                      |                                                            |                            |                                                  |
| <b>Official Title<br/>(author/ year of publication)<br/>ClinicalTrials.gov ID number</b>                                                                                                                                                | <b>Drug<br/>(dose)</b>               | <b>N-<br/>participants<br/>(actual or<br/>anticipated)</b> | <b>Duration<br/>(week)</b> | <b>Year of<br/>registration<br/><br/>Sstatus</b> |
| Safety, Tolerability and Pharmacodynamic Activity of Sotagliflozin in Hemodynamically Stable Patients With Worsening Heart Failure.<br>NCT03292653                                                                                      | Sota<br>200 mg<br>or 400<br>mg       | 81                                                         | 5                          | Active,<br>Recruiting<br>04/12/2017              |

**Abbreviations:** UGE: urinary glucose excretion; T2D: type 2 diabetes mellitus; OAD: Oral Antidiabetic Agents;

Sota: sotagliflozin

**Supplementary Table 3.** Results of subgroup and sensitivity analysis.

| <b>Treatment duration</b>                     |                                                                                        |                                                                                          |
|-----------------------------------------------|----------------------------------------------------------------------------------------|------------------------------------------------------------------------------------------|
| <b>Outcome</b>                                | <b>treatment duration ≤12 weeks</b>                                                    | <b>treatment duration &gt;12 weeks</b>                                                   |
| <b>HbA1c(%)</b>                               | -0.37 (-0.56, -0.18), I <sup>2</sup> =0%, p=0.0001, N =5 comparisons, 261 participants | -0.36(-0.47, -0.26), I <sup>2</sup> =12%, p<0.00001, N =5 comparisons, 2977 participants |
| <b>FPG(mg/dL)</b>                             | -16.74 (-28.49, -5.00), I <sup>2</sup> =10%, p=0.005, N =5, 261 participants           | -16.77 (-23.05, -10.49), I <sup>2</sup> =25%, p<0.00001, N=5, 2977 participants          |
| <b>2h-PPG (mg/dL)</b>                         | -38.72 (-52.27, -25.16), I <sup>2</sup> =20%, p<0.00001, N=5, 261 participants         | -40.10(-63.73, -16.47), I <sup>2</sup> =30%, p=0.001, N=5, 278 participants              |
| <b>Total insulin dose (IU/d)</b>              | -9.51 (-17.91, -1.81), I <sup>2</sup> =0%, p=0.009, N=5, 261 participants              | -9.16 (-11.40, -6.92), I <sup>2</sup> =36%, p<0.00001, N=3, 2977 participants            |
| <b>Basalinsulin dose (IU/d)</b>               | -5.33 [-10.49,-1.49], I <sup>2</sup> =0%, p=0.03, N=3, 261 participants                | -8.89 (-11.16, -6.61) I <sup>2</sup> =0%, p<0.00001, N=5, 2977 participants              |
| <b>Bolus insulin dose (IU/d)</b>              | -13.77 [-23.04, -3.50] I <sup>2</sup> =34%, p=0.0004, N =5, 261 participants           | -9.51 (-13.10, -5.92), I <sup>2</sup> =24%, p<0.00001, N=5, 2977 participants            |
| <b>Time-in-Range (%)</b>                      | 11.31(6.75,15.87) I <sup>2</sup> =0%, p<0.00001, N=2, 120 participants                 | 8.88(4.25, 13.51) I <sup>2</sup> =36%, p=0.0002, N=4, 278 participants                   |
| <b>Body weight change (%)</b>                 | -2.63(-4.09, -1.17), I <sup>2</sup> =0%, p=0.0004, N=5, 261 participants               | -3.67(-4.25, -3.10), I <sup>2</sup> =0%, p<0.00001, N=5, 2977 participants               |
| <b>SystolicBP(mmHg)</b>                       | -8.65(-12.49, -4.81), I <sup>2</sup> =34%, p=0.0004, N=5, 285 participants             | -3.61(-4.55, -2.66), I <sup>2</sup> =0%, p<0.00001, N=5, 2977 participants               |
| <b>DiastolicBP(mmHg)</b>                      | -2.13 (-4.00, -0.27), I <sup>2</sup> =0%, p=0.02, N=3, 285 participants                | -1.36 (-1.93, -0.80), I <sup>2</sup> =0%, p<0.00001, N=3, 2977 participants              |
| <b>eGFR (ml/min/1.73 m<sup>2</sup>)</b>       | -2.26(-4.41, -0.11), I <sup>2</sup> =0%, p=0.04, N=5, 261 participants                 | -0.42(-1.15, 0.32), I <sup>2</sup> =0%, p=0.26, N=5, 2977 participants                   |
| <b>Albumin-creatinine ratio (ACR)(mg/g)</b>   | No studies                                                                             | -14.57(-26.87, -2.28), I <sup>2</sup> =0%, p=0.02, N=3, 2977 participants                |
| <b>Hypoglycemia (events per patient-year)</b> | -9.82(-16.00, -1.48), I <sup>2</sup> =0%, p=0.01, N=3, 261 participants                | -9.71(-15.05, -4.38), I <sup>2</sup> =0%, p<0.00001, N=3, 2977 participants              |
| <b>Severe hypoglycemia</b>                    | 0.41(0.13, 1.28), I <sup>2</sup> =0%, p=0.12, N=5, 261 participants                    | 0.72(0.51, 1.04), I <sup>2</sup> =0%, p=0.08, N=5, 2977 participants                     |
| <b>DKA</b>                                    | 1.23(0.31, 4.94) I <sup>2</sup> =0%, p=0.77, N=5, 261 participants                     | 5.89(2.60, 13.36), I <sup>2</sup> =0%, p<0.00001, N=5, 2977 participants                 |
| <b>UTI</b>                                    | 0.70(0.20, 2.42), I <sup>2</sup> =0%, p=0.57, N=5, 261 participants                    | 0.99(0.71, 1.37), I <sup>2</sup> =0%, p<0.00001, N=5, 2977 participants                  |

|                                             |                                                                                            |                                                                                           |
|---------------------------------------------|--------------------------------------------------------------------------------------------|-------------------------------------------------------------------------------------------|
| <b>GTI</b>                                  | 1.21(0.30, 4.86), I <sup>2</sup> =0%, p=0.79, N=35 261 participants                        | 3.36(2.27, 4.96), I <sup>2</sup> =0%, p<0.00001, N=5, 2977 participants                   |
| <b>Diarrhea</b>                             | 1.70(1.08, 2.77), I <sup>2</sup> =0%, p=0.04, N=5, 261 participants                        | 1.59(1.12, 2.24), I <sup>2</sup> =0%, p=0.009, N=5, 2977 participants                     |
| <b>Volume depletion events</b>              | 2.62 (1.18, 5.82), I <sup>2</sup> =3%, p=0.02, N=5, 261 participants                       | 1.37 (0.30, 2.19), I <sup>2</sup> =0%, p=0.68, N=5, 2977 participants                     |
| <b>MACE</b>                                 | No events, N =5 comparisons, 261 participants                                              | 1.05(0.46, 2.43), I <sup>2</sup> =0%, p=0.91, N=10, 2977 participants                     |
| <b>Initial HbA1c levels</b>                 |                                                                                            |                                                                                           |
| <b>Outcome</b>                              | <b>initial HbA1c levels &lt; 8%</b>                                                        | <b>initial HbA1c levels ≥8%</b>                                                           |
| <b>HbA1c(%)</b>                             | -0.27 (-0.35, -0.19), I <sup>2</sup> =0%, p<0.00001, N =5 comparisons, 1608 participants   | -0.44(-0.52, -0.36), I <sup>2</sup> =0%, p<0.00001, N =5 comparisons, 1630 participants   |
| <b>FPG (mg/dL)</b>                          | -14.77 [-23.25, -6.30], I <sup>2</sup> =25%, p=0.0006, N =3, 1608 participants             | -19.83 [-26.51, -13.15], I <sup>2</sup> =0%, p<0.00001, N =3, 1630 participants           |
| <b>2h-PPG (mg/dL)</b>                       | -39.82(-56.70, -22.94), I <sup>2</sup> =8%, p<0.00001, N =5, 311 participants              | -38.74 [-55.81, -21.67], I <sup>2</sup> =4%, p<0.00001, N =4, 228 participants            |
| <b>Total insulin dose (IU/d)</b>            | -9.23 (-12.12, -6.33), I <sup>2</sup> =39%, p<0.00001, N =5 comparisons, 1608 participants | -9.04(-11.48, -6.59), I <sup>2</sup> =0%, p<0.00001, N =5 comparisons, 1630 participants  |
| <b>Basal insulin dose (IU/d)</b>            | -8.19 (-10.84, -5.55), I <sup>2</sup> =0%, p<0.00001, N =5 comparisons, 1608 participants  | -7.76 (-11.23, -4.29), I <sup>2</sup> =0%, p<0.00001, N =5 comparisons, 1630 participants |
| <b>Bolus insulin dose (IU/d)</b>            | -9.94(-14.84, -5.05), I <sup>2</sup> =32%, p<0.00001, N =5 comparisons, 1608 participants  | -9.77(-14.01, -5.52), I <sup>2</sup> =0%, p<0.00001, N =5 comparisons, 1630 participants  |
| <b>Time-in-Range(%)</b>                     | 8.88(4.25, 13.5), I <sup>2</sup> =0%, p=0.0002, N =4, 278 participants                     | 11.31(6.75, 15.87), I <sup>2</sup> =0%, p<0.00001, N =2, 120 participants                 |
| <b>Body weight change(%)</b>                | -3.66(-4.44, -2.87), I <sup>2</sup> =30%, p<0.00001, N =5 comparisons, 1608 participants   | -3.50(-3.96, -3.03), I <sup>2</sup> =0%, p<0.00001, N =5 comparisons, 1630 participants   |
| <b>SystolicBP (mmHg)</b>                    | -3.27 (-4.76, -1.78), I <sup>2</sup> =0%, p<0.0001, N =5 comparisons, 1608 participants    | -6.67(-10.38, -2.96), I <sup>2</sup> =0%, p=0.0004, N =5 comparisons, 1630 participants   |
| <b>DiastolicBP (mmHg)</b>                   | -1.42(-2.20, -0.65), I <sup>2</sup> =0%, p=0.0003, N =5 comparisons, 1608 participants     | -1.44(-2.20, -0.69), I <sup>2</sup> =0%, p=0.0002, N =5 comparisons, 1630 participants    |
| <b>eGFR (ml/min/1.73 m<sup>2</sup>)</b>     | -1.35 (-2.26, -0.44), I <sup>2</sup> =0%, p=0.004, N =5, 1608 participants                 | -1.07 (-2.35, -0.29), I <sup>2</sup> =0%, p=0.21, N =5, 1630 participants                 |
| <b>Albumin-creatinine ratio (ACR)(mg/g)</b> | -13.92(-27.36, -0.48), I <sup>2</sup> =0%, p=0.04, N=4, 1608 participants                  | -20.10(-40.25, -0.63), I <sup>2</sup> =NA, p=0.04, N =1, 1402 participants                |
| <b>Hypoglycemia</b>                         | -13.47(-20.90, -6.03), I <sup>2</sup> =0%, p=0.004, N=5, 261 participants                  | -6.12(-10.96, -1.28), I <sup>2</sup> =0%, p=0.01 N=5, 2977 participants                   |

|                                |                                                                         |                                                                          |
|--------------------------------|-------------------------------------------------------------------------|--------------------------------------------------------------------------|
| (events per patient-year)      | N=5, 1608 participants                                                  | 1630 participants                                                        |
| <b>Severe Hypoglycemia</b>     | 0.69(0.46, 1.02), I <sup>2</sup> =0%, p=0.07, N=5, 1608 participants    | 0.71(0.36, 1.43), I <sup>2</sup> =0%, p=0.34, N =5, 1630 participants    |
| <b>DKA</b>                     | 6.62(2.04, 21.48), I <sup>2</sup> =0%, p=0.002, N=5, 1608 participants  | 2.21(0.43, 11.42), I <sup>2</sup> =0%, p=0.34, N =5, 1630 participants   |
| <b>UTI</b>                     | 0.86(0.48, 1.56), I <sup>2</sup> =0%, p=0.62, N =3, 1608 participants   | 0.96(0.57, 1.59), I <sup>2</sup> =0%, p=0.86, N =3, 1630 participants    |
| <b>GTI</b>                     | 3.39(1.53, 7.52), I <sup>2</sup> =14%, p<0.003, N =5, 1608 participants | 2.97(1.71, 5.19), I <sup>2</sup> =0%, p=0.0001, N =5, 1630 participants  |
| <b>Diarrhea</b>                | 1.50 (0.97, 2.29), I <sup>2</sup> =0%, p=0.07, N =5, 1608 participants  | 0.98 (0.32, 3.01), I <sup>2</sup> =0%, p=0.98, N =5, 1630 participants   |
| <b>Volume depletion Events</b> | 1.89 (0.76, 4.68), I <sup>2</sup> =0%, p=0.17, N =5, 1608 participants  | 2.68 (0.93, 7.73), I <sup>2</sup> =0%, p=0.0001, N =5, 1630 participants |
| <b>MACE</b>                    | 0.89(0.33, 2.44), I <sup>2</sup> =0%, p=0.82, N =5, 1608 participants   | 5.03(0.24, 104.55), I <sup>2</sup> =0%, p=0.30, N =5, 1630 participants  |

### Duration of diabetes

| Outcome                          | duration of diabetes<20 yr                                                                | duration of diabetes≥20 yr                                                     |
|----------------------------------|-------------------------------------------------------------------------------------------|--------------------------------------------------------------------------------|
| <b>HbA1c (%)</b>                 | -0.33(-0.44, -0.22), I <sup>2</sup> =0%, p<0.00001, N =4 comparisons, 902 participants    | -0.36(-0.46, -0.25), I <sup>2</sup> =0%, p<0.00001, N =6, 2336 participants    |
| <b>FPG (mg/dL)</b>               | -17.18(-31.70, -2.66), I <sup>2</sup> =0%, p=0.01, N =4 comparisons, 902 participants     | -18.19(-23.76, -12.62), I <sup>2</sup> =0%, p<0.00001, N =6, 2336 participants |
| <b>2h-PPG (mg/dL)</b>            | -51.96(-67.00, -36.92), I <sup>2</sup> =0%, p<0.00001, N =4 comparisons, 262 participants | -29.94(-42.98, -16.89), I <sup>2</sup> =16%, p<0.00001, N =5, 277 participants |
| <b>Total insulin dose (IU/d)</b> | -7.16(-9.79, -4.53), I <sup>2</sup> =0%, p<0.00001, N =4 comparisons, 902 participants    | -9.75(-12.21, -7.28), I <sup>2</sup> =0%, p<0.00001, N =6, 2336 participants   |
| <b>Basal insulin dose (IU/d)</b> | -5.83 (9.47, -2.19), I <sup>2</sup> =0%, p=0.002, N =4 comparisons, 902 participants      | -9.14(-11.72, -6.56), I <sup>2</sup> =0%, p<0.00001, N =6, 2336 participants   |
| <b>Bolus insulin dose (IU/d)</b> | -9.42(-14.79, -4.04), I <sup>2</sup> =0%, p=0.0006, N =4 comparisons, 902 participants    | -9.18 (-13.47, -4.90), I <sup>2</sup> =20%, p<0.00001, N =6, 2336 participants |
| <b>Time-in-Range(%)</b>          | 11.53(8.21, 14.84), I <sup>2</sup> =0%, p<0.00001, N =4 comparisons, 262 participants     | 7.69(1.52, 13.89), I <sup>2</sup> =0%, p=0.02, N =2, 136 participants          |
| <b>Body weight change (%)</b>    | -3.13(-3.82, -2.44), I <sup>2</sup> =0%, p<0.00001, N =4 comparisons, 902 participants    | -3.13(-3.82, -2.44), I <sup>2</sup> =0%, p<0.00001, N =6, 2336 participants    |
| <b>SystolicBP (mmHg)</b>         | -3.50(-5.72, -1.28), I <sup>2</sup> =0%, p=0.0002, N =4 comparisons, 902 participants     | -4.01(-5.33, -2.70), I <sup>2</sup> =13%, p<0.00001, N =6, 2336 participants   |
| <b>DiastolicBP (mmHg)</b>        | -1.24(-2.27, -0.21), I <sup>2</sup> =0%, p=0.02, N =4 comparisons, 902 participants       | -1.51(-2.14, -0.87), I <sup>2</sup> =0%, p<0.00001, N =6, 2336 participants    |
| <b>eGFR</b>                      | -1.36(-2.47, -0.26), I <sup>2</sup> =0%, p=0.02, N =4                                     | -0.66(-1.36, -0.04), I <sup>2</sup> =0%, p=0.04, N =6,                         |

|                                               |                                                                                        |                                                                            |
|-----------------------------------------------|----------------------------------------------------------------------------------------|----------------------------------------------------------------------------|
| (ml/min/1.73 m <sup>2</sup> )                 | comparisons, 902 participants                                                          | 2336 participants                                                          |
| <b>Albumin-creatinine ratio (ACR)(mg/g)</b>   | -20.45(-33.12, -7.77), I <sup>2</sup> =0%, p=0.002, N =2 comparisons, 782 participants | -15.71(-32.62, 1.21), I <sup>2</sup> =0%, p=0.01, N =3, 1798 participants  |
| <b>Hypoglycemia (events per patient-year)</b> | -13.68(-21.90, -5.46), I <sup>2</sup> =0%, p=0.001, N =4 comparisons, 902 participants | -7.58(-11.24, -1.91), I <sup>2</sup> =0%, p=0.006, N =6, 2336 participants |
| <b>Severe Hypoglycemia</b>                    | 0.68(0.36, 1.31), I <sup>2</sup> =0%, p=0.25, N =4 comparisons, 902 participants       | 0.70(0.47, 1.05), I <sup>2</sup> =0%, p=0.08, N =6, 2336 participants      |
| <b>DKA</b>                                    | 4.60(1.82, 15.73), I <sup>2</sup> =0%, p=0.006, N =4 comparisons, 902 participants     | 4.30(1.98, 9.31), I <sup>2</sup> =0%, p=0.0002, N =6, 2336 participants    |
| <b>UTI</b>                                    | 1.13(0.62, 2.07), I <sup>2</sup> =0%, p=0.69, N =4 comparisons, 902 participants       | 0.91(0.63, 1.32), I <sup>2</sup> =0%, p=0.73, N =6, 2336 participants      |
| <b>GTI</b>                                    | 3.76(1.73, 8.16), I <sup>2</sup> =0%, p=0.0008, N =4 comparisons, 902 participants     | 2.95(1.92, 4.52), I <sup>2</sup> =0%, p<0.00001, N =6, 2336 participants   |
| <b>Diarrhea</b>                               | 1.85 (0.93, 3.68), I <sup>2</sup> =0%, p=0.08, N =4 comparisons, 902 participants      | 1.39 (0.92, 2.09), I <sup>2</sup> =0%, p=0.12, N =6, 2336 participants     |
| <b>Volume depletion events</b>                | 1.55 (0.63, 3.83), I <sup>2</sup> =0%, p=0.34, N =4 comparisons, 902 participants      | 2.10 (0.92, 4.85), I <sup>2</sup> =0%, p=0.12, N =6, 2336 participants     |
| <b>MACE</b>                                   | 2.02(0.34, 12.13), I <sup>2</sup> =0%, p=0.44, N =4 comparisons, 902 participants      | 0.82(0.17, 3.92), I <sup>2</sup> =0%, p=0.80, N =6, 2336 participants      |

### Background therapy

| <b>Outcome</b>                   | <b>stable insulin therapy</b>                                                  | <b>pre-randomization insulin optimization</b>                                 |
|----------------------------------|--------------------------------------------------------------------------------|-------------------------------------------------------------------------------|
| <b>HbA1c (5)</b>                 | -0.44(-0.52, -0.36), I <sup>2</sup> =0%, p<0.00001, N =6, 1663 participants    | -0.37(-0.45, -0.29), I <sup>2</sup> =0%, p<0.00001, N =4, 1575 participants   |
| <b>FPG (mg/dL)</b>               | -20.21(-27.60, -12.83), I <sup>2</sup> =0%, p<0.00001, N =6, 1663 participants | -13.46(-20.49, -6.43), I <sup>2</sup> =0%, p=0.0002, N =4, 1575 participants  |
| <b>2h-PPG (mg/dL)</b>            | -38.72(-52.27, -25.16), I <sup>2</sup> =19%, p<0.00001, N =5, 261 participants | -40.10 (-63.73, -16.47), I <sup>2</sup> =0%, p=0.0009, N =4, 278 participants |
| <b>Total insulin dose (IU/d)</b> | -9.26(-11.66, -6.87), I <sup>2</sup> =0%, p<0.00001, N =6, 1663 participants   | -8.94(-11.98, -5.89), I <sup>2</sup> =0%, p<0.00001, N =4, 1575 participants  |
| <b>Basal insulin dose (IU/d)</b> | -7.38(-10.71, -4.04), I <sup>2</sup> =0%, p<0.00001, N =6, 1663 participants   | -8.47(-11.18, -5.76), I <sup>2</sup> =0%, p<0.00001, N =4, 1575 participants  |
| <b>Bolus insulin dose(IU/d)</b>  | -10.12(-15.07, -5.16), I <sup>2</sup> =0%, p<0.0001, N =6, 1663 participants   | -8.51(-12.57, -4.45), I <sup>2</sup> =0%, p<0.0001, N =4, 1575 participants   |
| <b>Time-in-Range(%)</b>          | 11.31(6.75, 15.87), I <sup>2</sup> =0%, p<0.00001, N =6, 120 participants      | 9.35(5.50, 13.21), I <sup>2</sup> =0%, p<0.00001, N =4, 311 participants      |
| <b>Body weight change(%)</b>     | -3.48(-3.95, -3.02), I <sup>2</sup> =0%, p<0.00001, N =6, 1663 participants    | -3.70(-4.58, -2.83), I <sup>2</sup> =0%, p<0.00001, N =4, 1575 participants   |

|                                               |                                                                               |                                                                                |
|-----------------------------------------------|-------------------------------------------------------------------------------|--------------------------------------------------------------------------------|
| <b>SystolicBP (mmHg)</b>                      | -6.67(-10.38, -2.96), I <sup>2</sup> =0%, p=0.0004, N =6, 1663 participants   | -3.27([-4.76, -1.78), I <sup>2</sup> =0%, p<0.0001, N =4, 1575 participants    |
| <b>DiastolicBP (mmHg)</b>                     | -1.43(-2.18, -0.69), I <sup>2</sup> =0%, p=0.0002, N =6, 1663 participants    | -1.43(-2.22, -0.65), I <sup>2</sup> =0%, p=0.0004, N =4, 1575 participants     |
| <b>eGFR (ml/min/1.73 m<sup>2</sup>)</b>       | -0.98(-1.70, -0.23), I <sup>2</sup> =0%, p=0.03, N =6, 1663 participants      | -1.37(-2.22, -0.52), I <sup>2</sup> =0%, p=0.002, N =4, 1575 participants      |
| <b>Albumin-creatinine ratio (ACR)(mg/g)</b>   | -20.10(-39.57, -0.63), I <sup>2</sup> =0%, p=0.04, N =1, 1402 participants    | -13.92(-27.36, -0.48), I <sup>2</sup> =0%, p=0.04, N =4, 1575 participants     |
| <b>Hypoglycemia (events per patient-year)</b> | -7.23(-12.05, -2.40), I <sup>2</sup> =0%, p=0.01, N =6, 1663 participants     | -13.32(-20.81, -5.83), I <sup>2</sup> =0%, p=0.0005, N =4, 1575 participants   |
| <b>Severe Hypoglycemia</b>                    | 0.70 (0.37, 1.04), I <sup>2</sup> =0%, p=0.08, N =6, 1663 participants        | 0.68(0.46, 1.02), I <sup>2</sup> =0%, p=0.06, N =4, 1575 participants          |
| <b>DKA</b>                                    | 3.08(1.32, 7.17), I <sup>2</sup> =0%, p=0.009, N =6, 1663 participants        | 6.90(1.91, 24.89), I <sup>2</sup> =0%, p=0.003, N =4, 1575 participants        |
| <b>UTI</b>                                    | 0.89 (0.54, 1.45), I <sup>2</sup> =0%, p=0.64, N =6, 1663 participants        | 1.03(0.68, 1.55), I <sup>2</sup> =0%, p=0.90, N =4, 1575 participants          |
| <b>GTI</b>                                    | 2.64(1.55, 4.49), I <sup>2</sup> =0%, p=0.0003, N =6, 1663 participants       | 3.68(2.17, 6.24), I <sup>2</sup> =0%, p<0.00001, N =4, 1575 participants       |
| <b>Diarrhea</b>                               | 1.59 (1.03, 2.46), I <sup>2</sup> =0%, p=0.04, N =6, 1663 participants        | 1.51 (1.07, 2.26], I <sup>2</sup> =0%, p=0.04, N =4, 1575 participants         |
| <b>Volume depletion events</b>                | 2.23 [0.90, 7.44], I <sup>2</sup> =0%, p=0.08, N =6, 1663 participants        | 1.80 (0.70, 4.65), I <sup>2</sup> =0%, p=0.22, N =4, 1575 participants         |
| <b>MACE</b>                                   | 0.89(0.33, 2.44), I <sup>2</sup> =0%, p=0.82, N =6, 1663 participants         | 1.03 (0.24, 10.55) I <sup>2</sup> =0%, p=0.78, N =4, 1575 participants         |
| <b>Renal function at baseline</b>             |                                                                               |                                                                                |
| <b>Outcome</b>                                | <b>eGFR≥60 ml/min/1.73 m<sup>2</sup></b>                                      | <b>eGFR≥45 ml/min/1.73m<sup>2</sup></b>                                        |
| <b>HbA1c (%)</b>                              | -0.39 (-0.63, -0.14), I <sup>2</sup> =0%, p=0.0002, N =4, 174 participants    | -0.37 (-0.46, -0.27), I <sup>2</sup> =0%, p<0.00001, N =6, 3064 participants   |
| <b>FPG (mg/dL)</b>                            | -18.29 (-32.87, -3.71), I <sup>2</sup> =28%, p=0.01, N =4, 174 participants   | -17.46(-23.00, -11.92), I <sup>2</sup> =6%, p<0.00001, N =6, 3064 participants |
| <b>2h-PPG (mg/dL)</b>                         | -33.81(-46.92, -20.69), I <sup>2</sup> =2%, p<0.00001, N =4, 174 participants | -45.63(-63.51, -27.75), I <sup>2</sup> =21%, p<0.00001, N =5, 365 participants |
| <b>Total insulin dose (IU/d)</b>              | -8.46 (-15.13, -1.79), I <sup>2</sup> =20%, p=0.01, N =4, 174 participants    | -9.03(-11.14, -6.92), I <sup>2</sup> =9%, p<0.00001, N =6, 3064 participants   |
| <b>Basal insulin dose (IU/d)</b>              | -8.51 [-15.60, -0.59], I <sup>2</sup> =8%, p=0.03, N =4, 174 participants     | -8.57 (-10.77, -6.36), I <sup>2</sup> =0%, p<0.00001, N =6, 3064 participants  |
| <b>Bolus insulin dose (IU/d)</b>              | -17.55 (-26.14, -8.96), I <sup>2</sup> =0%, p=0.01, N =4, 174 participants    | -9.04 (-12.21, -5.86), I <sup>2</sup> =6%, p<0.00001, N =4, 3064 participants  |

|                                               |                                                                            |                                                                               |
|-----------------------------------------------|----------------------------------------------------------------------------|-------------------------------------------------------------------------------|
| <b>Time-in-Range(%)</b>                       | 11.80 (3.50, 20.10), I <sup>2</sup> =NA, p=0.005, N =1, 33 participants    | 9.44 (5.88, 12.99), I <sup>2</sup> =17%, p<0.00001, N =5, 365 participants    |
| <b>Body weight change (%)</b>                 | -2.98 (-5.02, -0.95), I <sup>2</sup> =0%, p=0.0006, N =4, 174 participants | -3.64 (-4.16, -3.11), I <sup>2</sup> =35%, p<0.00001, N =6, 3064 participants |
| <b>SystolicBP (mmHg)</b>                      | -7.93(-13.06, -2.80), I <sup>2</sup> =0%, p=0.0002, N =4, 174 participants | -3.71(-4.64, -2.78), I <sup>2</sup> =0%, p<0.00001, N =6, 3064 participants   |
| <b>DiastolicBP (mmHg)</b>                     | -1.53(-2.59, -0.46), I <sup>2</sup> =28%, p=0.005, N =4, 174 participants  | -1.51(-2.33, -0.70), I <sup>2</sup> =0%, p<0.00001, N =6, 3064 participants   |
| <b>eGFR (ml/min/1.73 m<sup>2</sup>)</b>       | -1.21(-3.99, -0.57), I <sup>2</sup> =0%, p=0.04, N =4, 174 participants    | -0.78 [-1.42, -0.15], I <sup>2</sup> =0%, p=0.02, N =6, 3064 participants     |
| <b>Albumin-creatinine ratio (ACR)(mg/g)</b>   | No study                                                                   | -14.57(-26.87, -2.28), I <sup>2</sup> =0%, p=0.02, N =5, 2977 participants    |
| <b>Hypoglycemia (events per patient-year)</b> | -9.70 [-19.50, -3.11], I <sup>2</sup> =0%, p=0.01, N =4, 174 participants  | -9.47 (-14.55, -4.38), I <sup>2</sup> =0%, p<0.00001, N =6, 3064 participants |
| <b>Severe Hypoglycemia</b>                    | 0.49 (0.11, 2.06), I <sup>2</sup> =0%, p=0.33, N =4, 174 participants      | 0.71 (0.50, 1.01), I <sup>2</sup> =0%, p=0.06, N =6, 3064 participants        |
| <b>DKA</b>                                    | 8.06(1.04, 22.25), I <sup>2</sup> =0%, p=0.04, N =4, 174 participants      | 4.72 (1.99, 11.21), I <sup>2</sup> =0%, p=0.0002, N =6, 3064 participants     |
| <b>UTI</b>                                    | 0.35 (0.08, 1.59), I <sup>2</sup> =0%, p=0.91, N =4, 174 participants      | 1.01 (0.73, 1.40), I <sup>2</sup> =0%, p=0.76, N =6, 3064 participants        |
| <b>GTI</b>                                    | 2.29 (1.07, 7.71), I <sup>2</sup> =0%, p=0.04, N =4, 174 participants      | 3.38 (2.30, 4.98), I <sup>2</sup> =0%, p<0.00001, N =6, 3064 participants     |
| <b>Diarrhea</b>                               | 1.50 [1.08, 3.10], I <sup>2</sup> =0%, p=0.04, N =4, 174 participants      | 1.53 (1.09, 2.14), I <sup>2</sup> =0%, p=0.03, N =6, 3064 participants        |
| <b>Volume depletion events</b>                | 3.85 (0.89, 6.48), I <sup>2</sup> =0%, p=0.13, N =4, 174 participants      | 2.23 (0.91, 4.60), I <sup>2</sup> =0%, p=0.33, N =6, 3064 participants        |
| <b>MACE</b>                                   | No events, N =4, 174 participants                                          | 1.06 (0.40, 2.82), I <sup>2</sup> =0%, p=0.91, N =6, 3064 participants        |

### Sensitivity analysis: Peto Odds Ratio, fixed-effect model

| <b>Outcome</b>             | <b>OR(95%CI), I<sup>2</sup>, statistical significance, N-comparisons, participants</b> |
|----------------------------|----------------------------------------------------------------------------------------|
| <b>Severe Hypoglycemia</b> | 0.68(0.46, 0.98), I <sup>2</sup> =0%, p=0.04, N=10, 3238 participants                  |
| <b>DKA</b>                 | 3.92 (2.37, 6.47), I <sup>2</sup> =0%, p<0.00001, N=10, 3238 participants              |
| <b>UTI</b>                 | 0.98(0.71, 1.37), I <sup>2</sup> =0%, p=0.92, N=10, 3238 participants                  |
| <b>GTI</b>                 | 2.85(2.10, 3.87), I <sup>2</sup> =0%, p<0.00001, N=10, 3238 participants               |
| <b>Diarrhea</b>            | 1.55 (1.11, 2.16), I <sup>2</sup> =0%, p=0.01, N=10, 3238 participants                 |



|                                            |                                                                           |
|--------------------------------------------|---------------------------------------------------------------------------|
| <b>Nausea-vomiting</b>                     | 0.97(0.32, 2.96), I <sup>2</sup> =0%, p=0.96, N=10, 3238 participants     |
| <b>Headache</b>                            | 1.69(0.26, 11.04), I <sup>2</sup> =0%, p=0.58, N=10, 3238 participants    |
| <b>Sinusitis</b>                           | 1.07(0.06, 18.62), I <sup>2</sup> =0%, p=0.91, N=10, 3238 participants    |
| <b>Nasopharyngitis</b>                     | 1.07(0.14, 8.39), I <sup>2</sup> =0%, p=0.91, N=10, 3238 participants     |
| <b>Renal events</b>                        | 1.19(0.57, 2.45), I <sup>2</sup> =0%, p=0.65, N=10, 3238 participants     |
| <b>Acidosis-related Events</b>             | 3.70 (2.80, 4.90), I <sup>2</sup> =0%, p<0.00001, N=10, 3238 participants |
| <b>Volume depletion events</b>             | 2.64 (1.44, 4.83), I <sup>2</sup> =0%, p=0.01, N=10, 3238 participants    |
| <b>Bone fractures</b>                      | 0.70(0.39, 1.25), I <sup>2</sup> =0%, p=0.23, N=10, 3238 participants     |
| <b>Amputation</b>                          | 3.40(0.26, 18.38)I <sup>2</sup> =0%, p=0.38, N=10, 3238 participants      |
| <b>Suspected drug-induced liver injury</b> | 1.01(0.09, 11.13), I <sup>2</sup> =0%, p=0.99, N=10, 3238 participants    |
| <b>Serious AEs</b>                         | 1.13(0.86, 1.48), I <sup>2</sup> =0%, p=0.39, N=10, 3238 participants     |
| <b>AEs leading to Discontinuation</b>      | 1.57 (1.06, 2.34), I <sup>2</sup> =0%, p=0.02, N=10, 3238 participants    |
| <b>MACE</b>                                | 1.15(0.48, 2.80), I <sup>2</sup> =0%, p=0.75, N=10, 3238 participants     |
| <b>Cancer</b>                              | 0.67(0.22, 2.11), I <sup>2</sup> =0%, p=0.75, N=10, 3238 participants     |
| <b>All-cause deaths</b>                    | 0.19 (0.03, 1.51), I <sup>2</sup> =0%, p=0.12, N=10, 3238 participants    |

Abbreviations: AE: adverse events; FPG: fasting plasma glucose; MACE: major adverse cardiovascular outcomes DKA: diabetic ketoacidosis; GTI: genital tract infections; PPG: postprandial plasma glucose; UTI: urinary tract infections

**Supplementary Table 4.** Dose-response interactions: within-trial analysis of the pooled data from three RCTs<sup>28,30,31</sup>. Only statistically significant interactions between evaluated outcomes and sotagliflozin doses are reported.

| <b>Outcome</b>                                      | <b>Sotagliflozin 200 mg vs. 75 mg</b>                                      | <b>Sotagliflozin 400 mg vs. 200 mg</b>                                       |
|-----------------------------------------------------|----------------------------------------------------------------------------|------------------------------------------------------------------------------|
| <b>HbA1c(%)</b>                                     | -0.24 (-0.62, 0.14) I <sup>2</sup> =NA, p=0.22, N =1, 70 participants      | -0.22 (-0.28, -0.12), I <sup>2</sup> =0%, p=0.001, N =3, 1119 participants   |
| <b>FPG (mg/dL)</b>                                  | 0.0 (-14.06, 14.06), I <sup>2</sup> =NA, p=1.00, 1.0 N =1, 70 participants | -9.82 (-17.05, -2.58), I <sup>2</sup> =0%, p=0.008, N =3, 1119 participants  |
| <b>2h-PPG (mg/dL)</b>                               | -8.00(-27.46, 11.46), I <sup>2</sup> =NA, p<0.00001, N =1, 70 participants | -20.51 (-33.98, -7.03), I <sup>2</sup> =0%, p=0.003, N =3, 1119 participants |
| <b>Total insulin dose (%)</b>                       | 2.60(-6.78, 11.98), I <sup>2</sup> =0%, p=0.77, N =1, 70 participants      | -5.25(-7.66, -2.84), I <sup>2</sup> =0%, p<0.0001, N =3, 1119 participants   |
| <b>Basalinsulin dose (%)</b>                        | -0.10(-11.11, 10.91), I <sup>2</sup> =0%, p=0.99, N =1, 70 participants    | -4.64(-8.64, -0.64), I <sup>2</sup> =0%, p=0.01, N =3, 1119 participants     |
| <b>Bolus insulin dose (%)</b>                       | -2.80(-8.48, 14.08), I <sup>2</sup> =0%, p=0.89, N =1, 70 participants     | -7.85(-11.96, -3.75), I <sup>2</sup> =0%, p=0.0002, N =3, 1119 participants  |
| <b>Time-in-range(%)</b>                             | No study                                                                   | 6.48(2.97, 9.99), I <sup>2</sup> =0%, p=0.0003, N =2, 185 participants       |
| <b>Average daily Glucose(mg/dL)</b>                 | No study                                                                   | -11.02(-17.70, -4.33), I <sup>2</sup> =0%, p=0.001, N =2, 185 participants   |
| <b>Urinary glucose Excretion(g/24 hr)</b>           | 16.00(3.06, 28.94), p=0.03, N =1, 70 participants                          | 13.00(-1.78, 27.78), p=0.20, N =1, 70 participants                           |
| <b>Body weight (%)</b>                              | -1.33(-3.37, 0.71), p=0.20, N =1, 70 participants                          | -0.96 (-1.55, -0.37), I <sup>2</sup> =0%, p=0.001, N =3, 1119 participants   |
| <b>Systolic BP(mmHg)</b>                            | 1.60(-7.42, 10.62), p=0.53, N =1, 70 participants                          | -2.51 (-3.83, -1.20), I <sup>2</sup> =0%, p=0.0002, N =3, 1119 participants  |
| <b>eGFR (ml/min/1.73 m<sup>2</sup>)</b>             | -0.26(-4.95, 4.43), p=0.91, N =1, 70 participants                          | 1.05(0.11, 2.12], p=0.03, N =1, N =3, 1119 participants                      |
| <b>Urinary albumin/creatinine ratio (ACR)(mg/g)</b> | No study                                                                   | -12.29 (-26.81, -1.23), I <sup>2</sup> =0%, p=0.03, N =3, 1049 participants  |

**Supplementary Table 5: Summary of main findings of meta-analysis for safety outcomes in included RCTs**

| Outcome                                                       | Studies<br>(n) | Events/Participants<br>(n/N)                 |                | Effect<br>estimate<br>[95%CI]     | I <sup>2</sup><br>(%) |
|---------------------------------------------------------------|----------------|----------------------------------------------|----------------|-----------------------------------|-----------------------|
|                                                               |                | Sotagliflozin                                | Control        |                                   |                       |
|                                                               |                | <b>Hypoglycemia(events per patient-year)</b> | <b>6</b>       |                                   |                       |
| <b>Severe hypoglycemia</b>                                    | <b>6</b>       | <b>68/1912</b>                               | <b>57/1326</b> | <b>RR: 0.69<br/>(0.49, 0.98)</b>  | <b>0</b>              |
| <b>Diabetic ketoacidosis (DKA)</b>                            | <b>6</b>       | <b>61/1912</b>                               | <b>6/1326</b>  | <b>RR: 3.93<br/>(1.94, 7.96)</b>  | <b>0</b>              |
| Occurring at blood glucose>250 mg/dL<br>n(% total events)     |                | 42 (69%)                                     | 4 (67%)        |                                   |                       |
| Occurring at blood glucose≥150-250 mg/dL<br>n(% total events) |                | 19(31%)                                      | 2(33%)         |                                   |                       |
| Occurring at blood glucose<150-mg/dL<br>n(% total events)     |                | 0 (0%)                                       | 0 (0%)         |                                   |                       |
| <b>Urinary tract infections (UTIs)</b>                        | <b>6</b>       | <b>96/1912</b>                               | <b>63/1326</b> | <b>RR: 0.97<br/>(0.71, 1.33)</b>  | <b>0</b>              |
| <b>Genital mycotic infections (GTIs)</b>                      | <b>6</b>       | <b>161/1912</b>                              | <b>31/1326</b> | <b>RR: 3.12<br/>(2.14, 4.54)</b>  | <b>0</b>              |
| <b>Diarrhea</b>                                               | <b>6</b>       | <b>114/1912</b>                              | <b>46/1326</b> | <b>RR: 1.50<br/>(1.08, 2.10)</b>  | <b>0</b>              |
| <b>Nausea-vomiting</b>                                        | <b>6</b>       | <b>8/ 1912</b>                               | <b>7/1326</b>  | <b>RR: 0.60<br/>(0.12, 2.94)</b>  | <b>0</b>              |
| <b>Headache</b>                                               | <b>6</b>       | <b>3/1912</b>                                | <b>2/1326</b>  | <b>RR: 1.59<br/>(0.30, 8.33]</b>  | <b>0</b>              |
| <b>Sinusitis</b>                                              | <b>6</b>       | <b>1/1912</b>                                | <b>1/1326</b>  | <b>RR: 1.07<br/>[0.06, 15.62)</b> | <b>0</b>              |
| <b>Nasopharyngitis</b>                                        | <b>6</b>       | <b>2/1912</b>                                | <b>2/1326</b>  | <b>RR: 1.07<br/>(0.13, 8.67)</b>  | <b>0</b>              |
| <b>Renal events</b>                                           | <b>6</b>       | <b>21/1912</b>                               | <b>11/1326</b> | <b>RR: 1.16<br/>(0.56, 2.40)</b>  | <b>0</b>              |
| <b>Acidosis-related events</b>                                | <b>6</b>       | <b>187/1912</b>                              | <b>32/1326</b> | <b>RR: 3.85<br/>(2.33, 6.36)</b>  | <b>23</b>             |
| <b>Volume depletion events</b>                                | <b>6</b>       | <b>38/1912</b>                               | <b>8/1326</b>  | <b>RR: 2.19<br/>(1.10, 4.36)</b>  | <b>0</b>              |
| <b>Bone fractures</b>                                         | <b>6</b>       | <b>29/1912</b>                               | <b>23/1326</b> | <b>RR: 0.71<br/>(0.40, 1.24)</b>  | <b>0</b>              |
| <b>Amputation</b>                                             | <b>6</b>       | <b>2/1912</b>                                | <b>0/1326</b>  | <b>RR: 3.02</b>                   | <b>0</b>              |

|                                                         |          |                 |                 |                                  |           |
|---------------------------------------------------------|----------|-----------------|-----------------|----------------------------------|-----------|
|                                                         |          |                 |                 | (0.31, 29.09)                    |           |
| <b>Suspected drug-induced liver injury</b>              | <b>6</b> | <b>2/1912</b>   | <b>1/1326</b>   | <b>RR: 0.44<br/>(0.07, 2.76)</b> | <b>0</b>  |
| <b>Venous thromboembolism</b>                           | 6        | 0/1877          | 0/1888          | -                                | -         |
| <b>Serious AEs</b>                                      | <b>6</b> | <b>109/1912</b> | <b>143/1326</b> | <b>RR: 1.29<br/>(0.89, 1.82)</b> | <b>0</b>  |
| <b>AEs leading to discontinuation</b>                   | <b>6</b> | <b>81/1912</b>  | <b>31/1326</b>  | <b>RR: 1.34<br/>(0.78, 2.30)</b> | <b>25</b> |
| <b>Hypoglycemia</b>                                     |          | <b>1 (1%)*</b>  | <b>3(3%)*</b>   |                                  |           |
| <b>Severe hypoglycemia</b>                              |          | <b>4(6%)*</b>   | <b>3(5%)*</b>   |                                  |           |
| <b>Diabetic ketoacidosis (DKA)</b>                      |          | <b>23(38%)*</b> | <b>1(17%)*</b>  |                                  |           |
| <b>Urinary tract infections (UTIs)</b>                  |          | <b>3(3%)*</b>   | <b>4(6%)*</b>   |                                  |           |
| <b>Genital tract infections (GTIs)</b>                  |          | <b>9(6%)*</b>   | <b>3(10%)*</b>  |                                  |           |
| <b>Diarrhea</b>                                         |          | <b>8(7%)*</b>   | <b>3(7%)*</b>   |                                  |           |
| <b>Volume depletion events</b>                          |          | <b>1(4%)*</b>   | <b>1(12%)*</b>  |                                  |           |
| <b>Major adverse cardiovascular outcomes<br/>(MACE)</b> | <b>6</b> | <b>15/1912</b>  | <b>7/1326</b>   | <b>RR: 1.06<br/>(0.40, 2.82)</b> | <b>0</b>  |
| <b>AMI</b>                                              |          | 8               | 3               |                                  |           |
| <b>Stroke</b>                                           |          | 1               | 2               |                                  |           |
| <b>Hospitalization for HF/UA</b>                        |          | 0               | 0               |                                  |           |
| <b>Coronary revascularization</b>                       |          | 6               | 2               |                                  |           |
| <b>Cancer</b>                                           | <b>6</b> | <b>7/1912</b>   | <b>4/1326</b>   | <b>RR: 0.86<br/>(0.25, 2.97)</b> | <b>0</b>  |
| <b>Breast</b>                                           |          | 2               | 2               |                                  |           |
| <b>Lung</b>                                             |          | 3               | 2               |                                  |           |
| <b>Thyroid</b>                                          |          | 1               | 0               |                                  |           |
| <b>Melanoma</b>                                         |          | 1               | 0               |                                  |           |
| <b>All-cause death</b>                                  | <b>6</b> | <b>1/1912</b>   | <b>3/1326</b>   | <b>RR: 0.35<br/>(0.07, 1.70)</b> | <b>0</b>  |

**Abbreviations:** AE : adverse events; VTE: Venous thromboembolism; Sota: sotagliflozin; TID: total daily insulin dose; plcb: placebo; HF: heart failure; UA: unstable angina.

\*the percentage refers to the percentage of all patients experiencing that AE

For all outcomes, the length of follow-up ranged 4 to 52 weeks
